1     **High-throughput detection of neutralizing antibodies to**  
2             **SARS-CoV-2 variants using flow cytometry**

3  
4     **Running Head:** High-throughput broad SARS-CoV-2 variants  
5     neutralizing assay

6  
7     Xiaohan Zhang<sup>1,2\*</sup>, Yajie Wang<sup>3\*</sup>, Mansheng Li<sup>1\*</sup>, Haolong Li<sup>4\*</sup>, Xiaomei  
8     Zhang<sup>1</sup>, Xingming Xu<sup>1</sup>, Di Hu<sup>5</sup>, Te Liang<sup>1</sup>, Yunping Zhu<sup>1</sup>, Yongzhe Li<sup>4#</sup>,  
9     Bingwei Wang<sup>2#</sup> and Xiaobo Yu<sup>1,6#</sup>

10

11     **Affiliations**

12     <sup>1</sup>State Key Laboratory of Medical Proteomics, Beijing Proteome  
13     Research Center, National Center for Protein Sciences-Beijing  
14     (PHOENIX Center), Beijing Institute of Lifeomics, Beijing, 102206,  
15     China.

16     <sup>2</sup>School of Medicine, Nanjing University of Chinese Medicine, Nanjing  
17     210023, China.

18     <sup>3</sup>Department of Clinical Laboratory, Beijing Ditan Hospital, Capital  
19     Medical University, Beijing 100015, China.

20     <sup>4</sup>Department of Clinical Laboratory, Peking Union Medical College  
21     Hospital, Chinese Academy of Medical Science & Peking Union  
22     Medical College, Beijing 100730, China.

23 <sup>5</sup>ProteomicsEra Medical Co., Ltd., Beijing, 102206, China

24 <sup>6</sup>The First Affiliated Hospital of Wenzhou Medical University, Wenzhou,  
25 China.

26 \*These authors contributed equally to this work.

27 #Correspondence to [xiaobo.yu@hotmail.com](mailto:xiaobo.yu@hotmail.com) (X.Y.),  
28 [bingweiwang@njucm.edu.cn](mailto:bingweiwang@njucm.edu.cn) (B.W.) and [yongzhelipumch@126.com](mailto:yongzhelipumch@126.com) (Y.  
29 L).

30

31

32

33

34

35

36

37

38

39

40

41

42

43

44

## 45 **Abstract**

46 Detecting neutralizing antibodies (NAbs) to SARS-CoV-2 variants is  
47 crucial for controlling COVID-19 spread. We developed a  
48 high-throughput assay for the broad systematic examination of NAbs to  
49 eleven SARS-CoV-2 variants, which include D614G, Alpha, Beta,  
50 Gamma, Delta, Kappa, and Omicron sub-lineages BA.1-BA.5. The  
51 assay is cost-effective, reliable, 35-fold more sensitive than Luminex  
52 technology, and can include new variants during SARS-CoV-2  
53 evolution. Importantly, our results highly correlated with a commercial  
54 IgG serological assay ( $R = 0.89$ ) , the FDA-approved cPass sVNT  
55 assay ( $R = 0.93$ ), pseudivirus-based neutralizing assay ( $R = 0.96$ ,  $R =$   
56  $0.66$ ,  $R = 0.65$ ) and live virus based neutralization assay ( $R = 0.79$ ,  $R =$   
57  $0.64$ ) . Using this platform, we constructed a comprehensive overview  
58 of the interactions between SARS-CoV-2 variants' Spike trimer proteins  
59 and ACE2 receptors, and identified a polyclonal Ab with broad  
60 neutralizing activity. Furthermore, when compared to the D614G  
61 variant, we found that the serum NAbs elicited by the third dose  
62 vaccine demonstrated decreased inhibition to multiple SARS-CoV-2  
63 variants, including Gamma (0.94x), Alpha (0.91x), Delta (0.91x), Beta  
64 (0.81x), Kappa (0.81x), BA.2 (0.44x), BA.1 (0.43x), BA.3 (0.41x), BA.5  
65 (0.35x) and BA.4 (0.33x), in cohort of 56 vaccinated individuals.  
66 Altogether, our proteomics platform proves to be an effective tool to

67 detect broad NAbS in the population and aid in the development of

68 future COVID-19 vaccines and vaccination strategies.

69 **Keywords**

70 SARS-CoV-2, flow cytometry, neutralization, antibody, COVID-19

71

72

73

74

75

76

77

78

79

80

81

82

83

84

85

86

87

88

## 89 Introduction

90 The ongoing coronavirus 2019 (COVID-19) pandemic, caused by the  
91 severe acute respiratory syndrome coronavirus 2 (SARS-CoV-2),  
92 remains a public health concern worldwide. This is primarily attributed  
93 to the continuous evolution of the virus and its persistent transmission  
94 across global populations<sup>1</sup>. For instance, over ten SARS-CoV-2  
95 variants of concern (VOCs) have appeared, and these VOCs have the  
96 potential to reduce the immune response<sup>2</sup>. According to reports, 17.13%  
97 (95%CI, 7.55–26.71%) of asymptomatic infected individuals may have  
98 long-term health consequences<sup>3</sup>, which may include symptoms such  
99 as fatigue, brain fog, dizziness, gastrointestinal symptoms, as well as  
100 others<sup>4</sup>.

101 Neutralizing antibodies (NAbs) of SARS-CoV-2 are a subset of  
102 antibodies that block viral entry by inhibiting the interaction between  
103 the SARS-CoV-2's surface protein, Spike, and the host cell's receptor,  
104 angiotensin-converting enzyme 2 (ACE2). Such NAbs can be  
105 produced following COVID-19 vaccination or SARS-CoV-2 infection.  
106 Identifying SAR-CoV-2 NAbs is critical for assessing vaccine efficacy,  
107 evaluating individual and population immunity, monitoring variant  
108 susceptibility, and information public health measures to control the  
109 spread of COVID-19. However, traditional methods of NAb detection,  
110 such those that use a live virus or a pseudovirus-based neutralization

111 assay, are slow, expensive, carry a potential risk of infection, and may  
112 require specialized biosafety level 3 (BSL3) facilities<sup>5-8</sup>.

113 As an alternative approach, enzyme-linked immunosorbent assay  
114 (ELISA) can perform the *in vitro* neutralizing testing using purified  
115 Spike, ACE2, or Spike's receptor-binding domain (RBD) that interacts  
116 directly with ACE2 during viral entry. Several commercial ELISA-based  
117 surrogate virus neutralization tests (sVNT) have been developed,  
118 including TECO sVNT (TECO Medical) and cPASS sVNT (GenScript),  
119 which have been approved by the United States' (U.S.) Food and Drug  
120 Administration (FDA) or received Conformance Européenne (CE)  
121 marking for use in the European Union<sup>9,10</sup>. Unfortunately,  
122 ELISA-based methods only detect a single variant at a time, making  
123 them a time-consuming option when multiple SARS-CoV-2 variants are  
124 analyzed<sup>6</sup>.

125 To address this concern, Fenwick *et al.* developed a multiplexed  
126 *in-vitro* quantitative neutralization assay using Luminex technology in  
127 2021. The assay enables the detection of NAbs targeting various Spike  
128 mutations, including D614G, D614G plus M153T, N439K, S477N,  
129 S477R, E484K, S459Y, N501T, N501Y, K417N, 60-70, P681H, Y453F,  
130 and their combinations. The results obtained from this assay correlated  
131 with pseudovirus neutralization ( $R^2=0.65$ ) and live virus infection ( $R^2=$   
132  $0.825$ ) assays<sup>7</sup>.

133 In a similar vein, Lynch et al. developed a multiplexed surrogate  
134 virus neutralization test (plex-sVNT) for detecting NAbs to seven  
135 SARS-CoV-2 variants, namely, wild type, Alpha, Beta, Gamma, Delta,  
136 Kappa, and Epsilon. The results highly correlated (> 96%) with those  
137 obtained from a plaque reduction neutralization test (PRNT)<sup>8</sup>.

138 However, it should be noted that these technologies have  
139 limitations as they require access to specific Luminex and Bio-Rad  
140 instruments, thereby restricting their use to specific laboratories.  
141 Moreover, some recent Omicron variants have not been accessible for  
142 analysis using these methods to date<sup>11</sup>.

143 In this work, we developed a high-throughput broad neutralizing  
144 antibody (bNAb) assay that enables the systematic detection of NAbs  
145 to eleven SARS-CoV-2 VOCs that is reliable, cost-effective, sensitive,  
146 and used with a standard flow cytometer<sup>12</sup>. These variants include  
147 D614G, Alpha, Beta, Gamma, Delta, Kappa, Omicron BA.1, Omicron  
148 BA.2, Omicron BA.3, Omicron BA.4, and Omicron BA.5. We conducted  
149 a comparative analysis of NAb detection using our SARS-CoV-2 bNAb  
150 assay with commercial ELISA-based serology, U.S. FDA-approved  
151 cPASS sVNT, pseudivirus-based neutralizing assays and live virus  
152 based neutralization assay. Furthermore, we explored the applications  
153 of the SARS-CoV-2 bNAb assay for screening therapeutic Abs,  
154 assessing their neutralizing activity SARS-CoV-2. Finally, we analyzed

155 the broad responses of serological NAbs to SARS-CoV-2 variants in  
156 individuals who received the third dose of either the inactivated vaccine  
157 (Sinovac-CoronaVac) or the recombinant subunit vaccine (ZF2001) for  
158 COVID-19.

159

## 160 **Results**

### 161 **Schematic illustration of SARS-CoV-2 bNAb assay**

162 In the SARS-COV-2 bNAb assay, illustrated schematically in Figure 1A,  
163 the trimerized Spike proteins of six non-Omicron variants (D614G,  
164 Alpha, Beta, Kappa, Gamma, Delta) and five Omicron variants (BA.1,  
165 BA.2, BA.3, BA.4, BA.5) were expressed from human embryonic  
166 kidney 293 (HEK293) cells, purified, and coupled to the  
167 magnetic-fluorescent beads, as previously reported <sup>7,13</sup>. During the  
168 NAbs detection process, all coupled beads were mixed together and  
169 incubated with samples containing NAbs. The NAbs bound to the  
170 Spike trimer proteins, preventing their interaction with the biotinylated  
171 ACE2 receptors, which were coupled to streptavidin-phycoerythrin  
172 (SA-PE). The inhibition rate (%) was calculated as follows: Inhibition  
173 rate (%) = (1 - signal of NAb inhibition on Spike-ACE2 binding / signal  
174 of Spike-ACE2 binding) × 100%.

175 The sensitive detection of Spike-ACE2 interactions is essential for  
176 assessing the presence of NAbs in clinical samples. To address this



177 requirement, we coupled the Spike protein from six SARS-CoV-2  
178 variants (D614G, Alpha, Beta, Kappa, Delta, Omicron BA.1) onto  
179 magnetic-fluorescent beads from Luminex and Shenzhen Wellgrow  
180 Technology Co., Ltd. (“Wellgrow”), and then incubated with different  
181 concentrations of ACE2. Magnetic-fluorescent beads with the  
182 SARS-CoV-2 nucleocapsid (N) protein, rather than the Spike protein,  
183 was employed as the negative control. The binding signals were  
184 measured using Luminex-200 and Wellgrow flow cytometry. Notably,  
185 the fluorescent signal intensity and signal to noise ratio (SNR) were  
186 much higher with the Wellgrow platform than the Luminex platform  
187 when ACE2 concentrations ranged from 0.01 µg/mL to 100 µg/mL  
188 (Figure 1B, Figure S1 and Table S6).

189 Furthermore, we calculated the sensitivity or the lowest detection  
190 limit (LOD) of each method, in which the LOD was equal to the signal  
191 of the buffer control plus ten standard deviations (Figure 1C). The data  
192 showed that the average LOD of our assay using the Wellgrow  
193 platform was  $35.89 \pm 57.8$  [-21.91~93.69]-fold higher than the Luminex  
194 platform for all variants (D614G, Alpha, Beta, Kappa, Delta, Omicron  
195 BA.1).

196 At last, we compared the difference of NAb titers obtained by  
197 detecting the inhibition of antibody #26 to Spike-ACE2 interaction. The  
198 results showed that the IC50 obtained by two platforms are highly

199 consistence with the  $r$  correlation of 0.9988 (Figure S1D). Therefore,  
200 we chose the Wellgrow platform as the proteomics platform for the  
201 SARS-CoV-2 bNAb assay in this study.

202

### 203 **Mapping Spike-ACE2 interactions of SARS-CoV-2 variants**

204 Using our platform, we conducted a systematic investigation of the  
205 interactions between ACE2 and Spike trimer proteins from eleven  
206 SARS-CoV-2 variants. This was achieved by incubating a bead array  
207 with different concentrations of ACE2 (Figure 2). The results  
208 demonstrated that the fluorescent signals from the Spike trimer  
209 proteins increased with increasing concentrations of ACE2, indicating  
210 the formation of Spike-ACE2 complexes on the beads (Figure 2A).

211 Spike mutations were found to influence the interaction dynamics.  
212 At the maximal concentration of 10  $\mu\text{g}/\text{mL}$  ACE2, Alpha and Delta  
213 variants exhibited the highest signals, followed by Beta, BA.4, BA.5,  
214 D614G, Gamma, BA.1, BA.2, and Kappa, with BA.3 showing the  
215 lowest signal. In contrast, the N protein, used as a negative control,  
216 consistently displayed the lowest signal regardless of ACE2  
217 concentration.

218 To further assess the binding affinity, we calculated the  
219 half-maximal effective concentration (EC50) using the standard curve  
220 for each SARS-CoV-2 variant (Figure 2B). The results showed that

221 Omicron BA.1 has the highest binding affinity with an EC<sub>50</sub> of 0.2913  
222 µg/mL, followed by Beta (0.2913 µg/mL), Delta (0.3415 µg/mL),  
223 Omicron BA.4 (0.3592 µg/mL), Gamma (0.3833 µg/mL), Alpha (0.394  
224 µg/mL), Kappa (0.3983 µg/mL), Omicron BA. 2 (0.4307µg/mL),  
225 Omicron BA. 5(0.4593 µg/mL), D614G (0.5279 µg/mL), and Omicron  
226 BA.3 (1.283 µg/mL). The results are in accordance with surface plasma  
227 resonance data in which BA.1 has the strongest interaction with ACE2  
228 with a dissociation constant ( $K_D$ ) of 2.10 nM, followed by BA.2 (2.21 nM)  
229 and D614G (5.20 nM)<sup>14</sup>. Similar results were obtained by Mahalingam  
230 et al., who used ELISA to determine the EC<sub>50</sub> of ACE2 to Spike  
231 Omicron (0.38 nM), Delta (0.48 nM), and wild type (2.28 nM)<sup>15</sup>.  
232 Collectively, our data provide a comprehensive landscape of Spike  
233 trimer-ACE2 interactions for SARS-CoV-2 VOCs, as classified by the  
234 U.S. Centers for Disease Control and Prevention (CDC)  
235 ([https://www.cdc.gov/coronavirus/2019-ncov/variants/variant-classifica](https://www.cdc.gov/coronavirus/2019-ncov/variants/variant-classifications.html)  
236 [tions.html](https://www.cdc.gov/coronavirus/2019-ncov/variants/variant-classifications.html)). It should be noted that the Epsilon variant was not included  
237 in this work due to the unavailability of purified Spike trimer protein at  
238 the time of executing experiments.

239 In addition, to demonstrate the specificity of our assay, we tested  
240 the binding ability of ACE2 to the Spike proteins from MERS,  
241 SARS-CoV and six SARS-CoV-2 variants. The results showed that the  
242 binding signal of ACE2 to six SARS-CoV-2 variant Spike proteins was

243 much higher than that of SARS-CoV and MERS. The binding signal of  
244 SARS-CoV was 3.38-5.74 times lower than that of SARS-CoV-2  
245 variants, due to the homology of Spike sequence. There was no  
246 binding signal observed between ACE2 and MERS, similar to the  
247 negative control, N protein (Figure S2). All these results are accord to  
248 the reported results<sup>16</sup>, and demonstrate our assay is specific.

249

250 **Comparison of SARS-CoV-2 bNAb assay to ELISA , cPass sVNT,**  
251 **pseudovirus-based neutralization and live virus based**  
252 **neutralization assays.**

253 To assess the reliability of the SARS-CoV-2 bNAb assay, we compared  
254 the SARS-CoV-2 bNAb assay to an ELISA that was used to detect  
255 anti-Spike IgG antibodies<sup>17</sup>. The results showed a high correlation  
256 between the levels of D614G NAb detected using our SARS-CoV-2  
257 bNAb assay and the anti-Spike IgG antibodies obtained by the ELISA  
258 [R = 0.89, p-value (p) < 2.2 e-16] in a cohort of 75 individuals (Figure  
259 3A).

260 Next, we compared the NAb results obtained from the  
261 SARS-CoV-2 bNAb assay to those obtained from the FDA-approved  
262 cPass sVNT test<sup>6,9</sup>. The data obtained using the SARS-CoV-2 bNAb  
263 assay and cPass sVNT test demonstrated a higher correlation to each  
264 other (R = 0.93, p < 2.2 e-16) compared to the assay using Luminex

265 technology ( $R = 0.85$ )<sup>18</sup>. The positive percent agreement (PPA) was  
266 92.7% (80.1%-98.5%) and the negative percent agreement (NPA) was  
267 94.1% (80.3%-99.3%) (Figure 3B). The findings suggest that some of  
268 the anti-Spike IgG antibodies detected by the ELISA may lack  
269 neutralizing activity and therefore were not detected by SARS-CoV-2  
270 bNAb assay<sup>19</sup>. Overall, these results demonstrate the reliability of the  
271 SARS-CoV-2 bNAb assay as an *in vitro* platform for detecting serum  
272 NAbs.

273       Additionally, we compared the inhibition rate (%) of NAbs obtained  
274 by SARS-CoV-2 bNAb assay to the NAb titers obtained by  
275 pseudovirus-based neutralization assay or live virus based  
276 neutralization assay. For 10 serum samples from mice administered  
277 with WT mRNA vaccines, a high correlation was found between D614G  
278 NAbs inhibition rate (%) detected using SARS-CoV-2 bNAb assay and  
279 WT NAb titers by pseudovirus-based neutralization assay ( $R = 0.96$ ,  $p$   
280  $< 0.0001$ ) and live virus based neutralization assay ( $R = 0.79$ ,  $p <$   
281  $0.0001$ ) (Figures 3C, 3E). Similarly, for 10 serum samples from mice  
282 administered with BA.1 mRNA vaccines, notable correlations were  
283 observed between the levels of BA.1 NAbs detected using  
284 SARS-CoV-2 bNAb assay and pseudovirus-based neutralization ( $R =$   
285  $0.66$ ,  $p = 0.0017$ ) and live virus based neutralization assays ( $R = 0.64$ ,  
286  $p = 0.0022$ ) (Figures 3D, 3F). Then, we compared the inhibition rate (%)

287 of NAbS obtained by SARS-CoV-2 bNAb assay and the NAb titers  
288 obtained by pseudovirus-based neutralization assay in the serum of  
289 135 individuals with second dose vaccination. We detected serum  
290 NAbS against the D614G variant using both assays. The results  
291 showed a correlation coefficient ( $r$ ) of 0.65, demonstrating the  
292 consistency between the results obtained through inhibition and those  
293 obtained with NAb titers (Figure S4 and Table S7).

294

295 **Identification of broadly neutralizing monoclonal/polyclonal Abs**  
296 **against SARS-CoV-2 variants**

297 To demonstrate the application of SARS-CoV-2 bNAb assay in  
298 identifying monoclonal/polyclonal NAbS for potential treatment  
299 purposes, we tested six anti-Spike antibodies that are available in the  
300 laboratory<sup>20</sup> (Figure 4A). The results revealed that three antibodies  
301 (#26, #20, #21) have neutralizing activity. Antibodies #20 and #21  
302 inhibited ACE2 binding to D614G, Alpha, Beta, Kappa and Delta  
303 variants, but were not effective in inhibiting the ACE2 binding to the  
304 Omicron BA.1 variant. Antibody #26 exhibited the ability to inhibit  
305 Spike-ACE2 interactions for D614G, Alpha, Beta, Kappa, Delta and  
306 Omicron BA.1 variants.

307 Subsequently, the half-maximal inhibitory concentration (IC<sub>50</sub>)  
308 values were calculated and represented in a heatmap (Figure 4B). The

309 results showed that antibody #26 possessed broad neutralizing activity  
310 to all tested SARS-CoV-2 variants (Kappa, D614G, Alpha, Delta, Beta,  
311 Omicron BA.1). The IC<sub>50</sub> to D614G (0.47 µg/mL) was confirmed with  
312 ELISA (0.35 µg/mL) and pseudovirus neutralizing assay (0.21 µg/mL)  
313 in our previous work<sup>20</sup>. While the IC<sub>50</sub> of antibody #26 to the Omicron  
314 variant was ten-fold lower than non-Omicron variants. These findings  
315 underscore the ability of our assay to rapidly screen for  
316 monoclonal/polyclonal NABs with potential therapeutic applications.

317

### 318 **Evaluation of serum NABs in individuals receiving the third dose** 319 **vaccination**

320 We tested the serum NABs from 56 individuals who received two doses  
321 of the inactivated vaccine (Sinovac-CoronaVac) and boosted with a  
322 third dose with either an inactivated vaccine or recombinant subunit  
323 vaccine (ZF2001) (Table 1)<sup>21</sup>. The inhibition rate (%) was calculated by  
324 deducting the background noise using 147 serum samples collected  
325 prior to the COVID-19 pandemic<sup>22</sup>. The results showed that the third  
326 dose vaccination elicited a strong protective immune response against  
327 the non-Omicron variants with the highest inhibition rate (%) of D614G,  
328 followed by Gamma, Alpha, Delta, and Kappa variants. Unfortunately,  
329 the inhibition rate (%) was much lower in Omicron BA.2 (0.44x), BA.1  
330 (0.43x), BA.3 (0.41x), BA.5 (0.35x), and BA.4 (0.33x) variants,

331 indicating the resistance of these variants to the Sinovac-CoronaVac  
332 vaccine and the ZF2001 vaccine (Figure 5A).

333 Next, we compared the inhibition (%) of serum NAb's in individuals  
334 who received either a third dose of inactivated vaccine or recombinant  
335 vaccine; no significant difference was observed (Figure 5B). These  
336 findings highlight the immunological resistance of different  
337 SARS-CoV-2 variants to the Sinovac-CoronaVac and ZF2001 vaccines,  
338 and suggest the need for developing a new vaccine that provides  
339 broad protection against SARS-CoV-2 variants.

340 Furthermore in order to demonstrate the specificity of our  
341 SARS-CoV-2 bNAb assay, we detected the serum from the individuals  
342 before vaccination (n = 147) and after three-dose vaccination (n = 56).  
343 The results showed that the serum NAb levels were significantly higher  
344 in the vaccination group than un-vaccination group ( $p < 0.0001$ ) (Figure  
345 S3), indicating our SARS-CoV-2 bNAb assay is highly specific for the  
346 detection of serum NAb's.

347

## 348 **Discussion**

349 Even though the World Health Organization has announced that  
350 COVID-19 is no longer a public health emergency of international  
351 concern, the genome sequence of SARS-CoV-2 is continually evolving  
352 and the new variants (i.e. EG.5) may have the potential to escape the



353 immunity and threat the people's health, especially among  
354 immunocompromised individuals<sup>23,24</sup>. Therefore, there is still a need for  
355 effective COVID-19 vaccines to prevent and control viral transmission.  
356 The development and deployment of vaccines for COVID-19, as well  
357 as the evaluation of population immunity, remain important for public  
358 health<sup>25</sup>.

359 In this work, we developed a high-throughput SARS-CoV-2 bNAb  
360 assay to detect a wide range of NAb to non-Omicron and Omicron  
361 variants. Compared to the assay using Luminex technology<sup>7,8</sup>, our  
362 SARS-CoV-2 bNAb assay is 35-fold more sensitive, 2.5-fold less costly,  
363 and can be accessible to any laboratory that has a standard flow  
364 cytometer with the 532 nm and 635 nm lasers. Moreover, the  
365 simultaneous detection of NAb to multiple SARS-CoV-2 variants can  
366 be achieved within a single experiment, and the assay can be  
367 periodically updated to include new variants. The reliability of NAb  
368 detection using our SARS-CoV-2 bNAb assay is demonstrated through  
369 comparisons with ELISA-based IgG serology, the cPass sVNT assay,  
370 pseudovirus-based neutralization assay and live virus based  
371 neutralization assay (Figure 3).

372 Using this platform, we constructed a comprehensive landscape of  
373 Spike trimer and ACE2 interactions for eleven SARS-CoV-2 variants  
374 (Figure 2). The results provide evidence that Omicron BA.1 showed the

375 strongest binding affinity to the ACE2 receptor<sup>26,27</sup>. Notably, the  
376 transmission rate of SARS-CoV-2 and its variants is dependent on  
377 numerous factors, including immune resistance, toxicity, etc<sup>28</sup>.

378 Furthermore, our investigation of serum NAbS in vaccinated  
379 individuals showed that the third dose of the inactivated vaccine or  
380 recombinant RBD vaccine resulted in a strong inhibition of Spike-ACE2  
381 interactions to the non-Omicron variants (D614G, Alpha, Beta, Gamma,  
382 Kappa). However, the protection was significantly decreased for  
383 Omicron variants (BA.2, BA.1, BA.3, BA.5, BA.4) (Figure 5). These  
384 results demonstrate the significance of our proteomics platform in  
385 evaluating the broad protective activity of COVID-19 vaccines, which  
386 can guide the development of COVID-19 vaccines.

387 It is important to acknowledge some limitations of our study. First,  
388 the *in vitro* detection of NAbS may not represent viral neutralization *in*  
389 *vivo*, although previously reported evidence has shown a good  
390 correlation between NAbS detected *in vitro* and *vivo*<sup>5-8</sup>. Second, the  
391 relationship between the inhibition levels obtained with the  
392 SARS-CoV-2 bNAb assay and the SARS-CoV-2 infection remains  
393 unclear. Third, the number of clinical samples employed in this study  
394 was limited, and the assay should be executed in a larger cohort to  
395 determine the NAb levels induced by different vaccines and infection  
396 with SARS-CoV-2 variants. Finally, the SARS-CoV-2 wild-type was not

397 employed due to the unavailability of this protein during executing  
398 experiments. Instead, we employed the D614G variant, which shares  
399 high homology with the wild type. Previous studies have demonstrated  
400 comparable neutralization potency between the D614G variant and the  
401 wild type<sup>29</sup>. Additionally, the D614G substitution does not significantly  
402 alter SARS-CoV-2 morphology and binding to the ACE2 receptor<sup>30</sup>.

403

## 404 **Conclusion**

405 We have successfully developed and validated a high-throughput  
406 proteomics platform, enabling the comprehensive evaluation of NAbs  
407 against a wide range of SARS-CoV-2 variants. This platform offers an  
408 efficient, sensitive, and cost-effective approach for detecting broad  
409 NAbs within the population, providing an opportunity to guide the  
410 design and evaluation of vaccines with enhanced protective efficacy  
411 against evolving SARS-CoV-2 strains. Overall, our work contributes to  
412 the ongoing efforts in combating the COVID-19 pandemic and  
413 advancing our understanding of immune responses to SARS-CoV-2.

414

## 415 **References**

- 416 1. The L. The COVID-19 pandemic in 2023: far from over. *Lancet*. 2023;401(10371):79.
- 417 2. Khoury DS, Docken SS, Subbarao K, et al. Predicting the efficacy of variant-modified  
418 COVID-19 vaccine boosters. *Nat Med*. 2023;29(3):574-578.
- 419 3. Ma Y, Deng J, Liu Q, et al. Long-Term Consequences of Asymptomatic SARS-CoV-2  
420 Infection: A Systematic Review and Meta-Analysis. *Int J Environ Res Public Health*.  
421 2023;20(2).

- 422 4. Thaweethai T, Jolley SE, Karlson EW, et al. Development of a Definition of Postacute  
423 Sequelae of SARS-CoV-2 Infection. *JAMA*. 2023.
- 424 5. Nie J, Li Q, Wu J, et al. Quantification of SARS-CoV-2 neutralizing antibody by a  
425 pseudotyped virus-based assay. *Nat Protoc*. 2020;15(11):3699-3715.
- 426 6. Tan CW, Chia WN, Qin X, et al. A SARS-CoV-2 surrogate virus neutralization test  
427 based on antibody-mediated blockage of ACE2-spike protein-protein interaction.  
428 *Nat Biotechnol*. 2020;38(9):1073-1078.
- 429 7. Fenwick C, Turelli P, Pellaton C, et al. A high-throughput cell- and virus-free assay  
430 shows reduced neutralization of SARS-CoV-2 variants by COVID-19 convalescent  
431 plasma. *Sci Transl Med*. 2021;13(605).
- 432 8. Lynch KL, Zhou S, Kaul R, et al. Evaluation of Neutralizing Antibodies against  
433 SARS-CoV-2 Variants after Infection and Vaccination Using a Multiplexed Surrogate  
434 Virus Neutralization Test. *Clin Chem*. 2022;68(5):702-712.
- 435 9. Perkmann T, Mucher P, Osze D, et al. Comparison of five Anti-SARS-CoV-2 antibody  
436 assays across three doses of BNT162b2 reveals insufficient standardization of  
437 SARS-CoV-2 serology. *J Clin Virol*. 2023;158:105345.
- 438 10. Bal A, Pozzetto B, Traub MA, et al. Evaluation of High-Throughput SARS-CoV-2  
439 Serological Assays in a Longitudinal Cohort of Patients with Mild COVID-19: Clinical  
440 Sensitivity, Specificity, and Association with Virus Neutralization Test. *Clin Chem*.  
441 2021;67(5):742-752.
- 442 11. Grant R, Sacks J, Abraham P, et al. When to update COVID-19 vaccine composition.  
443 *Nature Medicine* 2023(29):776–780.
- 444 12. Chao Z, Han Y, Jiao Z, et al. Prism Design for Spectral Flow Cytometry.  
445 *Micromachines (Basel)*. 2023;14(2).
- 446 13. Yu X, Hartmann M, Wang Q, et al. microFBI: a microfluidic bead-based  
447 immunoassay for multiplexed detection of proteins from a microL sample volume.  
448 *PLoS One*. 2010;5(10).
- 449 14. Wang Q, Guo Y, Iketani S, et al. Antibody evasion by SARS-CoV-2 Omicron  
450 subvariants BA.2.12.1, BA.4 and BA.5. *Nature*. 2022;608(7923):603-608.
- 451 15. Mahalingam G, Arjunan P, Periyasami Y, et al. Correlating the differences in the  
452 receptor binding domain of SARS-CoV-2 spike variants on their interactions with  
453 human ACE2 receptor. *Sci Rep*. 2023;13(1):8743.
- 454 16. Gorbalenya AE, Baker SC, Baric RS, et al. The species Severe acute respiratory  
455 syndrome-related coronavirus: classifying 2019-nCoV and naming it SARS-CoV-2.  
456 *Nature Microbiology*. 2020;5(4):536-544.
- 457 17. Zhan H, Gao H, Liu Y, et al. Booster shot of inactivated SARS-CoV-2 vaccine induces  
458 potent immune responses in people living with HIV. *J Med Virol*.  
459 2023;95(1):e28428.
- 460 18. Marien J, Michiels J, Heyndrickx L, et al. Evaluation of a surrogate virus  
461 neutralization test for high-throughput serosurveillance of SARS-CoV-2. *J Virol*  
462 *Methods*. 2021;297:114228.
- 463 19. Chen Y, Zhao X, Zhou H, et al. Broadly neutralizing antibodies to SARS-CoV-2 and  
464 other human coronaviruses. *Nat Rev Immunol*. 2023;23(3):189-199.
- 465 20. Liang T, Cheng M, Teng F, et al. Proteome-wide epitope mapping identifies a

- 466 resource of antibodies for SARS-CoV-2 detection and neutralization. *Signal*  
467 *Transduct Target Ther.* 2021;6(1):166.
- 468 21. Zhao X, Zhang R, Qiao S, et al. Omicron SARS-CoV-2 Neutralization from Inactivated  
469 and ZF2001 Vaccines. *N Engl J Med.* 2022;387(3):277-280.
- 470 22. Zhang J, Teng F, Zhang X, et al. Down-regulation of SARS-CoV-2 neutralizing  
471 antibodies in vaccinated smokers. *MedComm (2020).* 2022;3(3):e166.
- 472 23. Faraone JN, Qu P, Goodarzi N, et al. Immune evasion and membrane fusion of  
473 SARS-CoV-2 XBB subvariants EG.5.1 and XBB.2.3. *Emerging Microbes & Infections.*  
474 2023;12(2).
- 475 24. Antinori A, Bausch-Jurken M. The Burden of COVID-19 in the Immunocompromised  
476 Patient: Implications for Vaccination and Needs for the Future. *The Journal of*  
477 *Infectious Diseases.* 2023;228(Supplement\_1):S4-S12.
- 478 25. Lotfi H, Mazar MG, Ei NMH, et al. Vaccination is the most effective and best way to  
479 avoid the disease of COVID-19. *Immunity, Inflammation and Disease.* 2023;11(8).
- 480 26. Yin W, Xu Y, Xu P, et al. Structures of the Omicron spike trimer with ACE2 and an  
481 anti-Omicron antibody. *Science.* 2022;375(6584):1048-1053.
- 482 27. Ma W, Fu H, Jian F, et al. Immune evasion and ACE2 binding affinity contribute to  
483 SARS-CoV-2 evolution. *Nat Ecol Evol.* 2023.
- 484 28. Markov PV, Katzourakis A, Stilianakis NI. Antigenic evolution will lead to new  
485 SARS-CoV-2 variants with unpredictable severity. *Nat Rev Microbiol.*  
486 2022;20(5):251-252.
- 487 29. Yurkovetskiy L, Wang X, Pascal KE, et al. Structural and Functional Analysis of the  
488 D614G SARS-CoV-2 Spike Protein Variant. *Cell.* 2020;183(3):739-751 e738.
- 489 30. Hou YJ, Chiba S, Halfmann P, et al. SARS-CoV-2 D614G variant exhibits efficient  
490 replication ex vivo and transmission in vivo. *Science.* 2020;370(6523):1464-1468.
- 491 31. Zhang X, Zheng M, Wang H, et al. Inhibitor screening using microarray identifies the  
492 high capacity of neutralizing antibodies to Spike variants in SARS-CoV-2 infection  
493 and vaccination. *Theranostics.* 2022;12(6):2519-2534.
- 494 32. Yang L, Yu Y, Ma C, et al. Development of RBC Membrane Antigen Arrays for  
495 Validating Blood Grouping Reagents. *J Proteome Res.* 2018;17(9):3237-3245.
- 496 33. Salazar-García M, Acosta-Contreras S, Rodríguez-Martínez G, et al. Pseudotyped  
497 Vesicular Stomatitis Virus-Severe Acute Respiratory Syndrome-Coronavirus-2 Spike  
498 for the Study of Variants, Vaccines, and Therapeutics Against Coronavirus Disease  
499 2019. *Frontiers in Microbiology.* 2022;12.
- 500 34. Nie J, Li Q, Wu J, et al. Establishment and validation of a pseudovirus neutralization  
501 assay for SARS-CoV-2. *Emerging Microbes & Infections.* 2020;9(1):680-686.
- 502 35. Chen G-L, Li X-F, Dai X-H, et al. Safety and immunogenicity of the SARS-CoV-2  
503 ARCoV mRNA vaccine in Chinese adults: a randomised, double-blind,  
504 placebo-controlled, phase 1 trial. *The Lancet Microbe.* 2022;3(3):e193-e202.
- 505 36. Robin X, Turck N, Hainard A, et al. pROC: an open-source package for R and S+ to  
506 analyze and compare ROC curves. *BMC Bioinformatics.* 2011;12:77.

507

508 **Contributions**

509 X.Z. and D.H. executed the experiments; M.L., X. Z., X.Z., X.X., T. L.,  
510 and Y. Z. performed the data analysis; H.L. and Y.W. provided the  
511 clinical samples. X.Y., Y. L., B.W. and X.Z. wrote and revised the paper.

512

513 **Acknowledgment**

514 This work was supported by the Beijing Municipal Natural Science  
515 Foundation (M23010 and L234034), National Key R&D Program of  
516 China(2022YFE0210400, 2021YFA1301604, 2020YFE0202200),  
517 State Key Laboratory of Proteomics (SKLP-O202007), Academic  
518 leader of high-level public health technical personnel construction  
519 project of Beijing Municipal Health Commission (2022-2-014),  
520 Guangdong Province Science and Technology Planning Project  
521 (2020B1111100006), Innovation Team and Talents Cultivation Program  
522 of National Administration of Traditional Chinese Medicine. (No:  
523 ZYYCXTD-C-202204). We would like to thank the bioinformatics  
524 platform of the National Center for Protein Sciences (Beijing) for their  
525 support in the data analysis of this project. We also thank Dr. Brianne  
526 Petritis for her critical review and editing of this manuscript.

527

528 **Declaration of Interest Statement**

529 The authors have declared no conflict of interest.

530

## 531 **Supplementary materials**

532 This article contains Supplementary Figure 1-4 and Supplementary

533 Table1-7.

534

## 535 **Tables**

536 Table 1. Clinical serum samples employed in this study

| <b>3<sup>rd</sup> dose vaccination cohort</b>                         |                                          |           |
|-----------------------------------------------------------------------|------------------------------------------|-----------|
| <b>( n=56 )</b>                                                       |                                          |           |
| <b>Gender</b>                                                         |                                          |           |
|                                                                       | Male                                     | 16(28.6%) |
|                                                                       | Female                                   | 40(71.4%) |
| <b>Age (years)</b>                                                    |                                          |           |
|                                                                       | Range                                    | 21-70     |
|                                                                       | ≤50                                      | 50(89.3%) |
|                                                                       | >50                                      | 6(10.7%)  |
| <b>Vaccination type</b>                                               |                                          |           |
|                                                                       | Recombinant RBD-subunit vaccine (ZF2001) | 38(83.9%) |
|                                                                       | Inactivated vaccine (Sinovac-Coron aVac) | 18(16.1%) |
| <b>Days of serum collection after 3<sup>rd</sup> dose vaccination</b> |                                          | 28        |

537

## 538 **Figure legends**

539 **Figure 1. Schematic illustration of the high throughput**

540 **SARS-CoV-2 bNAb assay.** (A) Workflow of the SARS-CoV-2 bNAb

541 assay. The Spike-ACE2 interaction is a direct binding reaction between

542 Spike trimer proteins and biotinylated ACE2. Upon the addition of the

543 NAbs, the beads coupled with SARS-CoV-2 variants Spike trimer  
544 proteins are incubated with NAbs. The NAbs with neutralizing activity  
545 will block the Spike interaction with biotinylated ACE2 and SA-PE. The  
546 signal intensities of the Spike trimer-ACE2 interaction are inversely  
547 proportional to the level of NAbs. During the NAbs detection process,  
548 all coupled beads were mixed together and incubated with samples  
549 containing NAbs. The NAbs bound to the Spike trimer proteins,  
550 preventing their interaction with the biotinylated ACE2 receptors, which  
551 were coupled to streptavidin-phycoerythrin (SA-PE). (B) Dose  
552 relationship curve of Spike-ACE2 interactions using Wellgrow and  
553 Luminex platforms. MFI = mean fluorescence intensity. (C) A  
554 comparison of the sensitivity to detect Spike-ACE2 interactions with the  
555 Wellgrow and Luminex platforms.

556

557 **Figure 2. Spike trimer-ACE2 interactions across different**  
558 **SARS-CoV-2 variants and ACE2 concentrations.** (A) Dose  
559 relationship curve of the interactions between ACE2 and six  
560 SARS-CoV-2 non-Omicron variants and five Omicron variants The  
561 x-axis represents the concentrations of the host ACE2 receptor. The  
562 y-axis represents the median of fluorescent signal intensity (MFI) of the  
563 SARS-CoV-2 Spike trimer-ACE2 interaction. N = nucleocapsid protein,  
564 which was used as a negative control. (B) Distribution of the NAb



565 resistance to SARS-CoV-2 variants. The x-axis represents the  
566 SARS-CoV-2 variants. The y-axis represents the EC50 calculated from  
567 SARS-CoV-2 variant Spike-ACE2 interactions. The corresponding  
568 values on the Y-axis are Omicron BA.1 (0.2913  $\mu\text{g/mL}$ ), Beta (0.2913  
569  $\mu\text{g/mL}$ ), Delta (0.3415  $\mu\text{g/mL}$ ), Omicron BA.4 (0.3592  $\mu\text{g/mL}$ ), Gamma  
570 (0.3833  $\mu\text{g/mL}$ ), Alpha (0.394  $\mu\text{g/mL}$ ), Kappa (0.3983  $\mu\text{g/mL}$ ), Omicron  
571 BA. 2 (0.4307 $\mu\text{g/mL}$ ), Omicron BA. 5(0.4593  $\mu\text{g/mL}$ ), D614G (0.5279  
572  $\mu\text{g/mL}$ ), and Omicron BA.3 (1.283  $\mu\text{g/mL}$ ), respectively.

573

574 **Figure 3. Comparison of SARS-CoV-2 bNAb assay to ELISA ,**  
575 **cPass sVNT, pseudovirus-based neutralization and live virus**  
576 **based neutralization assays.** (A) Correlation analysis of serological  
577 IgG detection between the SARS-CoV-2 bNAb assay and an  
578 ELISA-based IgG serology. (B) Correlation analysis of NAb detection  
579 using the SARS-CoV-2 bNAb assay and the FDA-approved cPass  
580 sVNT test. The concordance of NAb detection using the ELISA and  
581 sVNT assays was calculated as the positive and negative percent  
582 agreement (PPA and NPA, respectively). The blue and red dots  
583 represent positive (neutralizing activity) and negative (non-neutralizing)  
584 cases as determined by the comparative analysis, respectively. (C)  
585 Correlation analysis of D614G NAb's inhibition rate (%) from the  
586 SARS-CoV-2 bNAb assay with WT NAb titers from pseudovirus-based

587 neutralization assays. (D) Correlation analysis of BA.1 NAb inhibition  
588 rate (%) from the SARS-CoV-2 bNAb assay with BA.1 NAb titers from  
589 pseudovirus-based neutralization assays. (E) Correlation analysis of  
590 D614G NAb inhibition rate (%) from the SARS-CoV-2 bNAb assay  
591 with WT NAb titers from live virus based neutralization assays. (F)  
592 Correlation analysis of BA.1 NAb inhibition rate (%) from the  
593 SARS-CoV-2 bNAb assay with BA.1 NAb titers from live virus based  
594 neutralization assays.

595

596 **Figure 4. Identification of monoclonal/polyclonal Abs with broad**  
597 **neutralizing capability.** (A) Dose relationship curve demonstrating the  
598 ability of the NAb to inhibit SARS-CoV-2 variant Spike trimer-ACE2  
599 interactions. The x-axis represents the concentrations of the NAb. The  
600 y-axis represents the percent activity (%) of the NAb. N = nucleocapsid  
601 protein, which was used as a negative control. (B) Heatmap showing  
602 the IC50 of NAb against different SARS-CoV-2 variants. The detail of  
603 monoclonal/polyclonal Abs are provided in Table S5.

604

605 **Figure 5. Detection of serum NAb in vaccinated individuals.** (A)  
606 Boxplot showing the distribution of inhibition rate (%) of serum NAb  
607 against SARS-CoV-2 variants in 56 vaccinated individuals. (B)  
608 Comparison of NAb produced between groups receiving the

609 inactivated vaccine (Sinovac-CoronaVac) or recombinant subunit  
610 vaccine (ZF2001). The significance was performed using the Student's  
611 *t*-test (p-value < 0.01). \*\*, \*\*\*, and \*\*\*\* represent a p-value less than  
612 0.01, 0.001, and 0.0001, respectively.

613

## 614 **Materials and methods**

### 615 **Collection of clinical samples**

616 Clinical serum samples were collected from Beijing Ditan Hospital 28  
617 days after the third dose of the COVID-19 vaccine (Table 1). Whole  
618 blood was collected in a vacutainer tube, and the serum was obtained  
619 via centrifugation at 4,000 × g at room temperature for 10 minutes. The  
620 serum was then transferred to a clean tube and stored at -80 °C until  
621 use. This study was approved by the Ethics Committee of Beijing Ditan  
622 Hospital (No.2021-010-01), and an exemption of informed consent was  
623 obtained before sera collection<sup>31</sup>.

624

### 625 **Preparation of SARS-CoV-2 bNAbs reagents**

626 The SARS-CoV-2 bNAbs assay was developed in ProteomicsEra  
627 Medical Co., Ltd (Beijing, China). Briefly, 3 µg SARS-CoV-2 Spike  
628 trimer proteins (Sino Biological., Novoprotein and ACROBiosystems;  
629 China) (Table S1) were coupled to 1×10<sup>6</sup> magnetic-fluorescent beads  
630 (Wellgrow Technology Co., Ltd.) as previously described<sup>32</sup>. First, 12

631 differently encoded magnetic-fluorescent beads, numbered 102-108  
632 and 201-205 (Table S2), were chosen. Then 125  $\mu\text{L}$  containing  
633  $1 \times 10^6$  beads were washed with 100  $\mu\text{L}$  ddH<sub>2</sub>O and activated with 80  
634  $\mu\text{L}$  of "activation buffer" (50 mM 2-(N-morpholino) ethanesulfonic acid  
635 (MES) pH 5.0) (Sigma-Aldrich, St. Louis, MO). Then the activated  
636 beads were mixed with 10  $\mu\text{L}$  of 50 mg/mL sulfo-N-hydroxysuccinimide  
637 (NHS) (Thermo Scientific, USA) and 10  $\mu\text{L}$  of 50 mg/mL  
638 1-Ethyl-3-[3-dimethylaminopropyl]-carbodiimide hydrochloride (EDC)  
639 (Solarbio, Beijing, China). After incubation for 20 min at room  
640 temperature with gentle mixing, the beads were washed twice with 250  
641  $\mu\text{L}$  "coupling buffer" (50 mM MES pH 5.0) and resuspended in 200  $\mu\text{L}$   
642 coupling buffer. Then 3  $\mu\text{g}$  of Spike trimer proteins were added to the  
643 bead solution and incubated for 2 h at room temperature. After washing,  
644 the beads underwent blocking with "blocking buffer" (PBST-B, PBS pH  
645 7.4, 0.05% Tween-20, 1% BSA), and the coupled beads were  
646 subsequently stored at 2-8 °C in "storage buffer" (PBST-BN, PBS pH  
647 7.4, 0.05% Tween-20, 0.1% BSA, 0.05% NaN<sub>3</sub>).

648

#### 649 **Detection of Spike-ACE2 interactions using SARS-CoV-2 bNAbs** 650 **assay**

651 First, a 50  $\mu\text{L}$  mixed solution containing 12 different SARS-CoV-2 Spike  
652 trimer protein-coupled beads (2500 beads per type) (Table S3) was

653 added to each well of a 96-well plate, followed by 50  $\mu$ L of different  
654 concentrations (0, 0.014, 0.041, 0.123, 0.370, 1.111, 3.333, 10  $\mu$ g/mL)  
655 of biotinylated ACE2 (Sino Biological). After incubation for 1 h at room  
656 temperature on a shaker, the beads were magnetically separated using  
657 a magnetic separator (Wellgrow Technology Co., Ltd.) and washed  
658 three times with 100  $\mu$ L PBST-B (PBS pH7.4 , 0.05% Tween-20, 0.1%  
659 BSA). After washing, the Spike-ACE2 interaction was detected using  
660 50  $\mu$ L SA-PE (Thermo Scientific, USA) (2  $\mu$ g/mL) for 30 minutes at  
661 room temperature. Finally, after washing with PBST-B twice, the beads  
662 were resuspended in a 200  $\mu$ L PBST-B solution. The fluorescent signal  
663 was then detected at 200 beads/region using the EasyCell flow  
664 cytometry (Wellgrow Technology Co., Ltd.) with excitation wavelengths  
665 of 532 nm and 635 nm.

666

667 **Detection of monoclonal/polyclonal NAbS using the SARS-CoV-2**  
668 **bNAb assay**

669 To detect monoclonal/polyclonal NAbS, a 50  $\mu$ L mixed solution  
670 containing 7 different SARS-CoV-2 Spike trimer protein-coupled beads  
671 (2500 beads per type) (Table S4) was added to each well of a 96-well  
672 plate. Following that, 50  $\mu$ L of each antibody solution at different  
673 concentrations (0, 0.014, 0.041, 0.123, 0.370, 1.111, 3.333, 10  $\mu$ g/mL)  
674 for anti-Spike antibodies (#26, #20, #21, #22, #23, #73) (Table S5) was

675 added to individual wells of a 96-well plate. After incubation for 2 h at  
676 room temperature on a shaker, the beads were washed with PBST-B  
677 three times, then the beads were incubated with 50  $\mu$ L biotinylated  
678 ACE2 (0.5  $\mu$ g/mL) for 1 hour at room temperature. After washing, the  
679 binding of ACE2 to Spike trimer proteins were detected using 50  $\mu$ L  
680 SA-PE (2  $\mu$ g/mL) for 30 minutes at room temperature. Finally, after  
681 washing with PBST-B twice, the beads were resuspended in a 200  $\mu$ L  
682 PBST-B solution. The fluorescent signal was then detected at 200  
683 beads/region using the EasyCell flow cytometry (Wellgrow Technology  
684 Co., Ltd.) with excitation wavelengths of 532 nm and 635 nm.

685

#### 686 **Detection of Serum NAbS using SARS-CoV-2 bNAb assay.**

687 First, a 50  $\mu$ L mixed solution containing 12 different SARS-CoV-2 Spike  
688 trimer protein-coupled beads (2500 beads per type) (Table S2) was  
689 added to each well of a 96-well plate, followed by 50  $\mu$ L of the serum  
690 samples which were diluted to 1:20 with PBST-B. After incubation for 2  
691 h at room temperature on a shaker, the beads were washed with  
692 PBST-B three times. Then the beads were incubated with 50  $\mu$ L  
693 biotinylated ACE2 (0.5  $\mu$ g/mL) for 1 hour at room temperature. After  
694 washing, the binding of ACE2 to Spike trimer proteins were detected  
695 using 50  $\mu$ L SA-PE (2  $\mu$ g/mL) and incubated the mixture for 30 minutes  
696 at room temperature. Finally, after washing with PBST-B twice, the

697 beads were resuspended in a 200  $\mu$ L PBST-B solution. The fluorescent  
698 signal was then detected at 200 beads/region using the EasyCell flow  
699 cytometry (Wellgrow Technology Co., Ltd.) with excitation wavelengths  
700 of 532 nm and 635 nm.

701

702 **Detection of Serum NAbs using the anti-Spike RBD IgG antibodies**  
703 **obtained by the ELISA.**

704 The assay was conducted as described previously<sup>17</sup>. A capture  
705 sandwich ELISA detection kit (PROPRIUM, Hangzhou, China) was  
706 used to detect SARS-CoV-2 antibodies against the Spike protein RBD.  
707 The SARS-CoV-2 Spike RBD protein was pre-coated onto the solid  
708 phase, allowing it to form an antigen-antibody complex with IgG  
709 anti-RBD antibodies from 100  $\mu$ L of diluted serum samples (1:30  
710 dilution ratio) or standards. After washing, HRP-conjugated anti-human  
711 IgG was added to form an antigen-antibody-HRP complex. The  
712 substrate solution TMB was then introduced, and the resulting color  
713 intensity was proportional to the level of SARS-CoV-2-neutralizing  
714 antibodies. The optical density (OD) at 450 nm was measured, and a  
715 threshold of 10 BAU/ml was used to determine sero-positive and  
716 negative samples for anti-Spike RBD IgG.

717

718 **Detection of Serum NAbs using cPass<sup>TM</sup> sVNT Kit.**

719 The assay was conducted as described previously<sup>17</sup>. Using competitive  
720 ELISA, the SARS-CoV-2 Surrogate Virus Neutralization Test (sVNT)  
721 assay (Genscript, Nanjing, China) identified neutralizing antibodies  
722 present in the bloodstream that obstruct the interaction between the  
723 viral Spike glycoprotein receptor-binding domain (RBD) and human  
724 ACE2. Following the manufacturer's instructions, diluted serum  
725 samples (1:10 dilution ratio) and controls were pre-incubated at 37°C for  
726 15 minutes to allow binding of neutralizing antibodies (NAb) and  
727 HRP-RBD (antigen derived from SARS-CoV-2 variant D614G), using a  
728 1:1 volume ratio. Subsequently, the mixture was transferred to a  
729 capture plate, pre-coated with hACE2 protein, where NAb-unbound  
730 HRP-RBD was captured on the plate, while NAb-bound HRP-RBD  
731 remained in the supernatant and was washed away. Next, 100 µL of  
732 TMB and 50 µL of stop solution were added, and the plate was read at  
733 450 nm. The sample's absorbance was inversely correlated with the  
734 titers of anti-SARS-CoV-2-neutralizing antibodies. To ensure result  
735 validity, the OD450 values of positive controls (> 1.0) and negative  
736 controls (< 0.3) had to fall within specific ranges. An inhibition rate of ≥  
737 30% was considered positive for SARS-CoV-2-neutralizing antibody  
738 determination. The inhibition rate was calculated as follows:  
739 
$$\text{Inhibition} = \left(1 - \frac{\text{OD value of sample}}{\text{OD value of negative}}\right) \times 100\%.$$
  
740



741

742 **Pseudovirus-based neutralization assay.**

743 The SARS-CoV-2 pseudovirus was prepared using the VSV-ΔG  
744 system in which the glycoprotein (G) gene was replaced with the firefly  
745 luciferase (Fluc) reporter gene<sup>33,34</sup>. The S protein was overexpressed  
746 and displayed on the VSV pseudovirus. Following S-ACE2 interaction,  
747 the pseudovirus entered the host cell where the Fluc gene was  
748 transcribed and translated. The addition of luciferase substrate  
749 resulted in luminescence where the amount of luminescence is  
750 proportional to the level of pseudoviral entry. The preparation process  
751 of SARS-CoV-2 pseudovirus begins with the cloning of the S gene  
752 encoding the S protein of the virus. Subsequently, this gene is inserted  
753 into a modified VSV backbone, replacing the original G gene. The  
754 resulting construct, containing the S protein gene in lieu of the G gene  
755 and complemented by the Fluc reporter gene, forms the foundation of  
756 the pseudovirus. The pseudovirus equipped with the S protein can  
757 interact with the ACE2 receptor on the surface of host cells, thereby  
758 facilitating the entry of the pseudovirus into the cells. Once inside the  
759 cells, the Fluc gene will be transcribed and translated to produce  
760 luciferase.

761 The assay was conducted following previously described  
762 methods<sup>20,35</sup>. Huh7 cells were seeded at a concentration of  $2 \times 10^4$

763 cells per well in 96-well plates and incubated until reaching 90-100%  
764 confluency, typically around 24 hours. Serum samples, subjected to  
765 serial 3-fold dilutions commencing at 1:10, were then incubated with  
766 650 TCID<sub>50</sub> of the pseudovirus for a precisely controlled duration of 1  
767 hour at 37 °C. Dulbecco's modified eagle medium (DMEM) served as  
768 the negative control. As a crucial negative control, Dulbecco's Modified  
769 Eagle Medium (DMEM) was employed. Following the incubation period,  
770 the supernatant was carefully aspirated, making way for the addition of  
771 luciferase substrate to each well. A subsequent 2-minute incubation in  
772 darkness at room temperature facilitated optimal enzymatic reactions.  
773 Luciferase activity, indicative of neutralizing antibody presence, was  
774 quantified using the GloMax® 9633 Microplate Luminometer (Promega,  
775 Madison, USA).

776

#### 777 **Live virus based neutralization assay.**

778 The assay was conducted as described previously<sup>35</sup>. To assess the  
779 SARS-CoV-2-specific NAb titer in serum, we employed a cytopathic  
780 effect (CPE)-based microneutralization assay, utilizing the  
781 SARS-CoV-2 virus strain BetaCoV/Beijing/IME-BJ01/2020 (Accession  
782 No. GWHACAX01000000) and Vero cells (ATCC, CCL81). Serum  
783 samples underwent heat inactivation for 30 minutes at 56 °C and were  
784 subsequently two-fold serially diluted (ranging from 1:4 to 1:2048)

785 using Dulbecco's Modified Eagle Medium (DMEM) from Thermo Fisher  
786 Scientific. These dilutions were then mixed with an equivalent volume  
787 of the virus solution to achieve a 50% tissue culture infectious dose  
788 (TCID<sub>50</sub>) of 100 in each well.

789 The serum-virus mixtures were incubated for 1 hour at 37 °C to  
790 allow for sufficient neutralization reactions to occur. Following  
791 incubation, the mixtures were gently added to 96-well plates containing  
792 semi-confluent Vero cells with a density exceeding 80%. The plates  
793 were then incubated for a further 3 days at 37 °C to allow for the  
794 development of cytopathic effects (CPEs) on the Vero cells. Using an  
795 inverted microscope, the CPEs on the Vero cells were carefully  
796 observed and recorded. The neutralizing titer was determined as the  
797 reciprocal of the highest sample dilution that successfully protected at  
798 least 50% of the cells from CPE. In cases where no neutralization  
799 reaction was observable even at the initial serum dilution of 1:4, an  
800 arbitrary titer of 2 (half of the limit of quantification) was assigned.

801

## 802 **Data analysis**

803 To compare the inhibition rate (%) of serum NAbs against the D614G  
804 variant and other SARS-CoV-2 variants, the raw inhibition rates of  
805 different variants were first normalized using minimum-maximum  
806 normalization. Statistical analyses were performed using Student's

807 *t*-test, with a *p*-value  $\leq 0.01$  considered as statistically significant.

808 Correlations between the SARS-CoV-2 bNAb, ELISA-based serology  
809 test, and the cPass sVNT test were determined using Pearson  
810 correlation coefficients. Positive and negative percent agreement (PPA,  
811 NPA) were performed using the positive and negative judgment results  
812 from ELISA-based IgG serology and cPass sVNT tests. Ideal cutoffs  
813 for the SARS-CoV-2 bNAb method that maximized PPA and NPA were  
814 calculated using the Youden Index, which was implemented in the R  
815 package pROC (v 1.18.2)<sup>36</sup>. All data analyses were carried out in R  
816 (v4.2.3) under the R studio (v 19.1.3) environment.

# Figure 1

A

medRxiv preprint doi: <https://doi.org/10.1101/2023.08.07.23293304>; this version posted May 10, 2024. The copyright holder for this preprint (which was not certified by peer review) is the author/funder, who has granted medRxiv a license to display the preprint in perpetuity. It is made available under a [CC-BY-NC-ND 4.0 International license](https://creativecommons.org/licenses/by-nc-nd/4.0/).

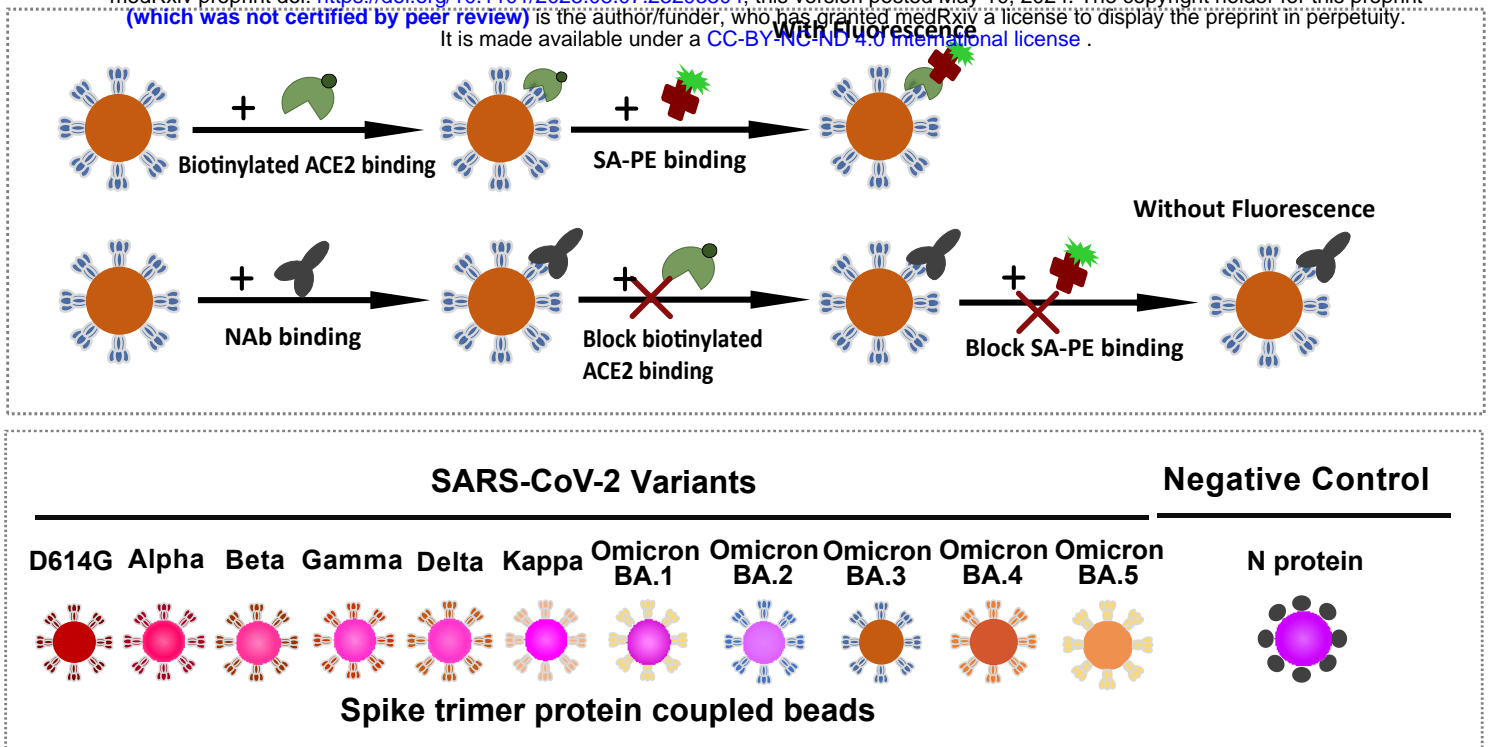

B

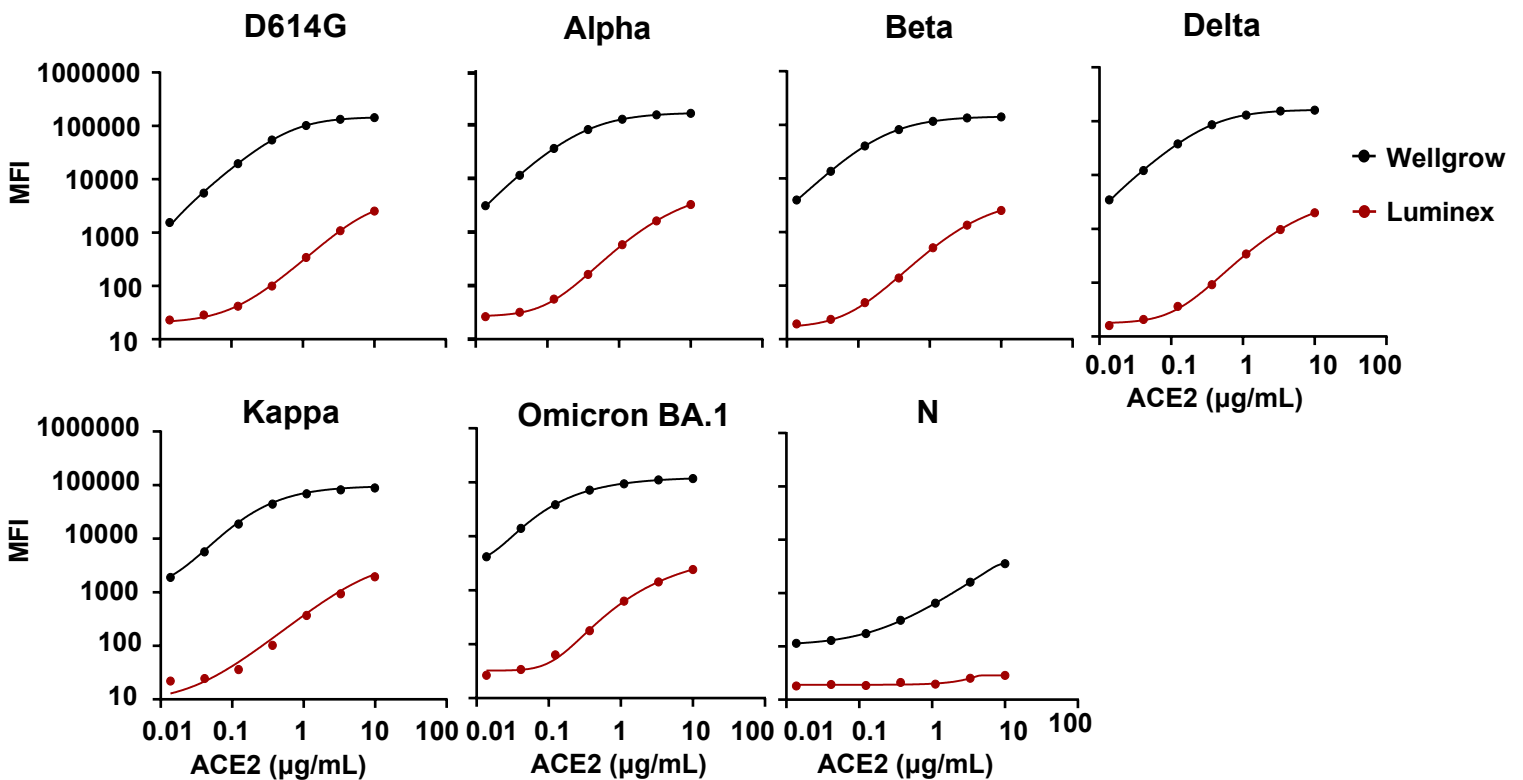

C

| LOD [µg/mL]           | D614G | Alpha | Beta  | Delta | Kappa | Omicron BA.1 | Average                         |
|-----------------------|-------|-------|-------|-------|-------|--------------|---------------------------------|
| Luminex               | 0.19  | 0.12  | 0.16  | 0.23  | 0.14  | 0.12         | 0.16                            |
| Wellgrow              | 0.006 | 0.003 | 0.005 | 0.003 | 0.007 | 0.008        | 0.005                           |
| Fold change [L/W] (x) | 31.67 | 40    | 32    | 76.67 | 20    | 15           | 35.89±57.80<br>[-21.91 ~ 93.69] |

# Figure 2

## A

medRxiv preprint doi: <https://doi.org/10.1101/2023.08.07.23293304>; this version posted May 10, 2024. The copyright holder for this preprint (which was not certified by peer review) is the author/funder, who has granted medRxiv a license to display the preprint in perpetuity. It is made available under a [CC-BY-NC-ND 4.0 International license](https://creativecommons.org/licenses/by-nc-nd/4.0/).

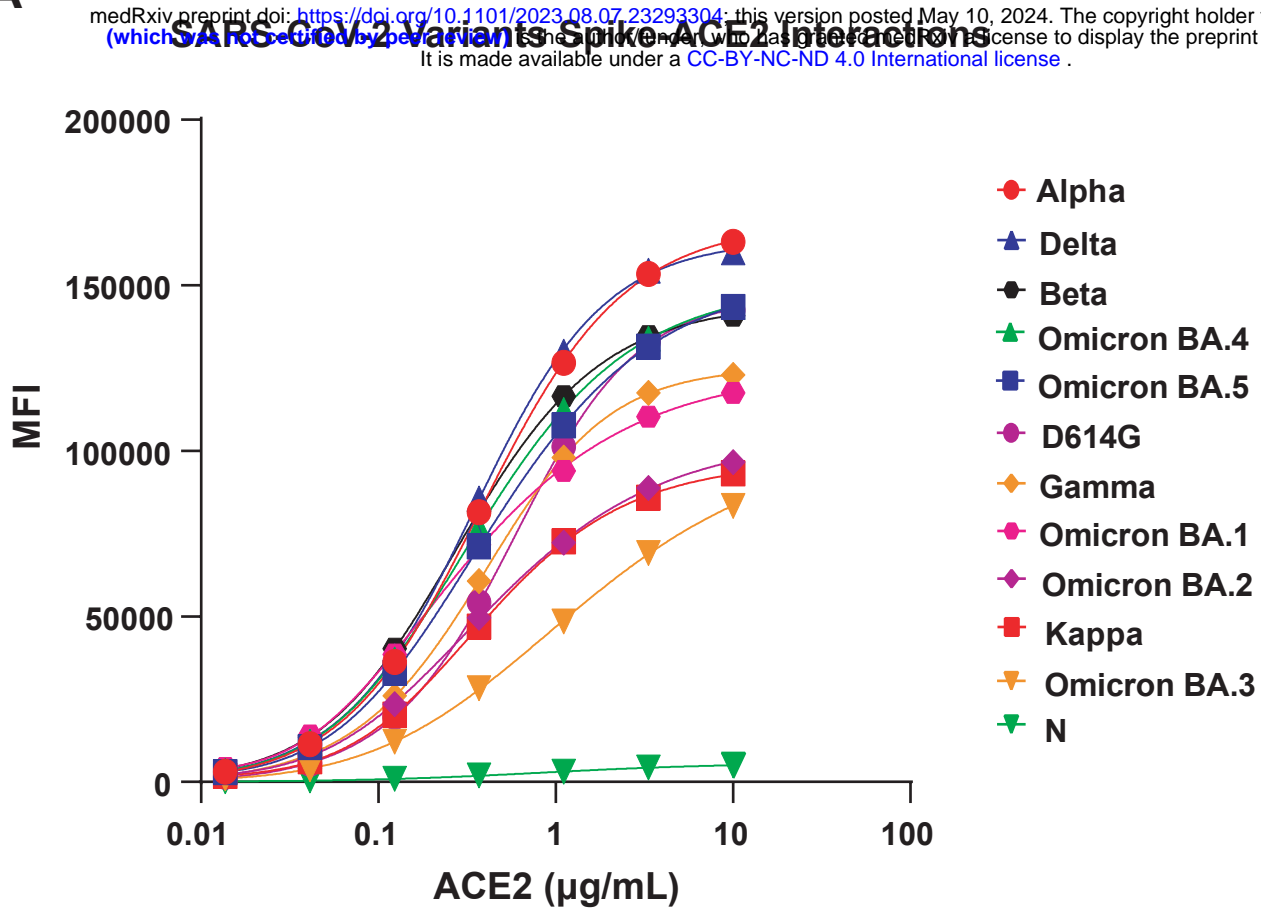

## B

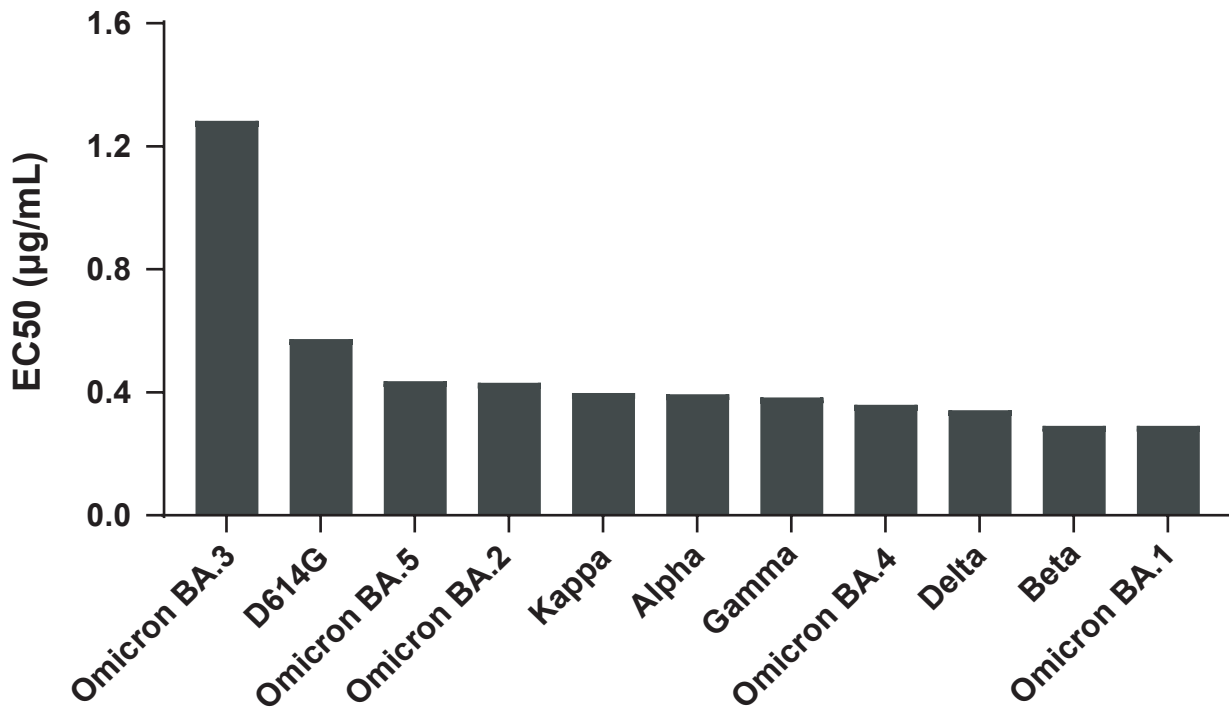

# Figure 3

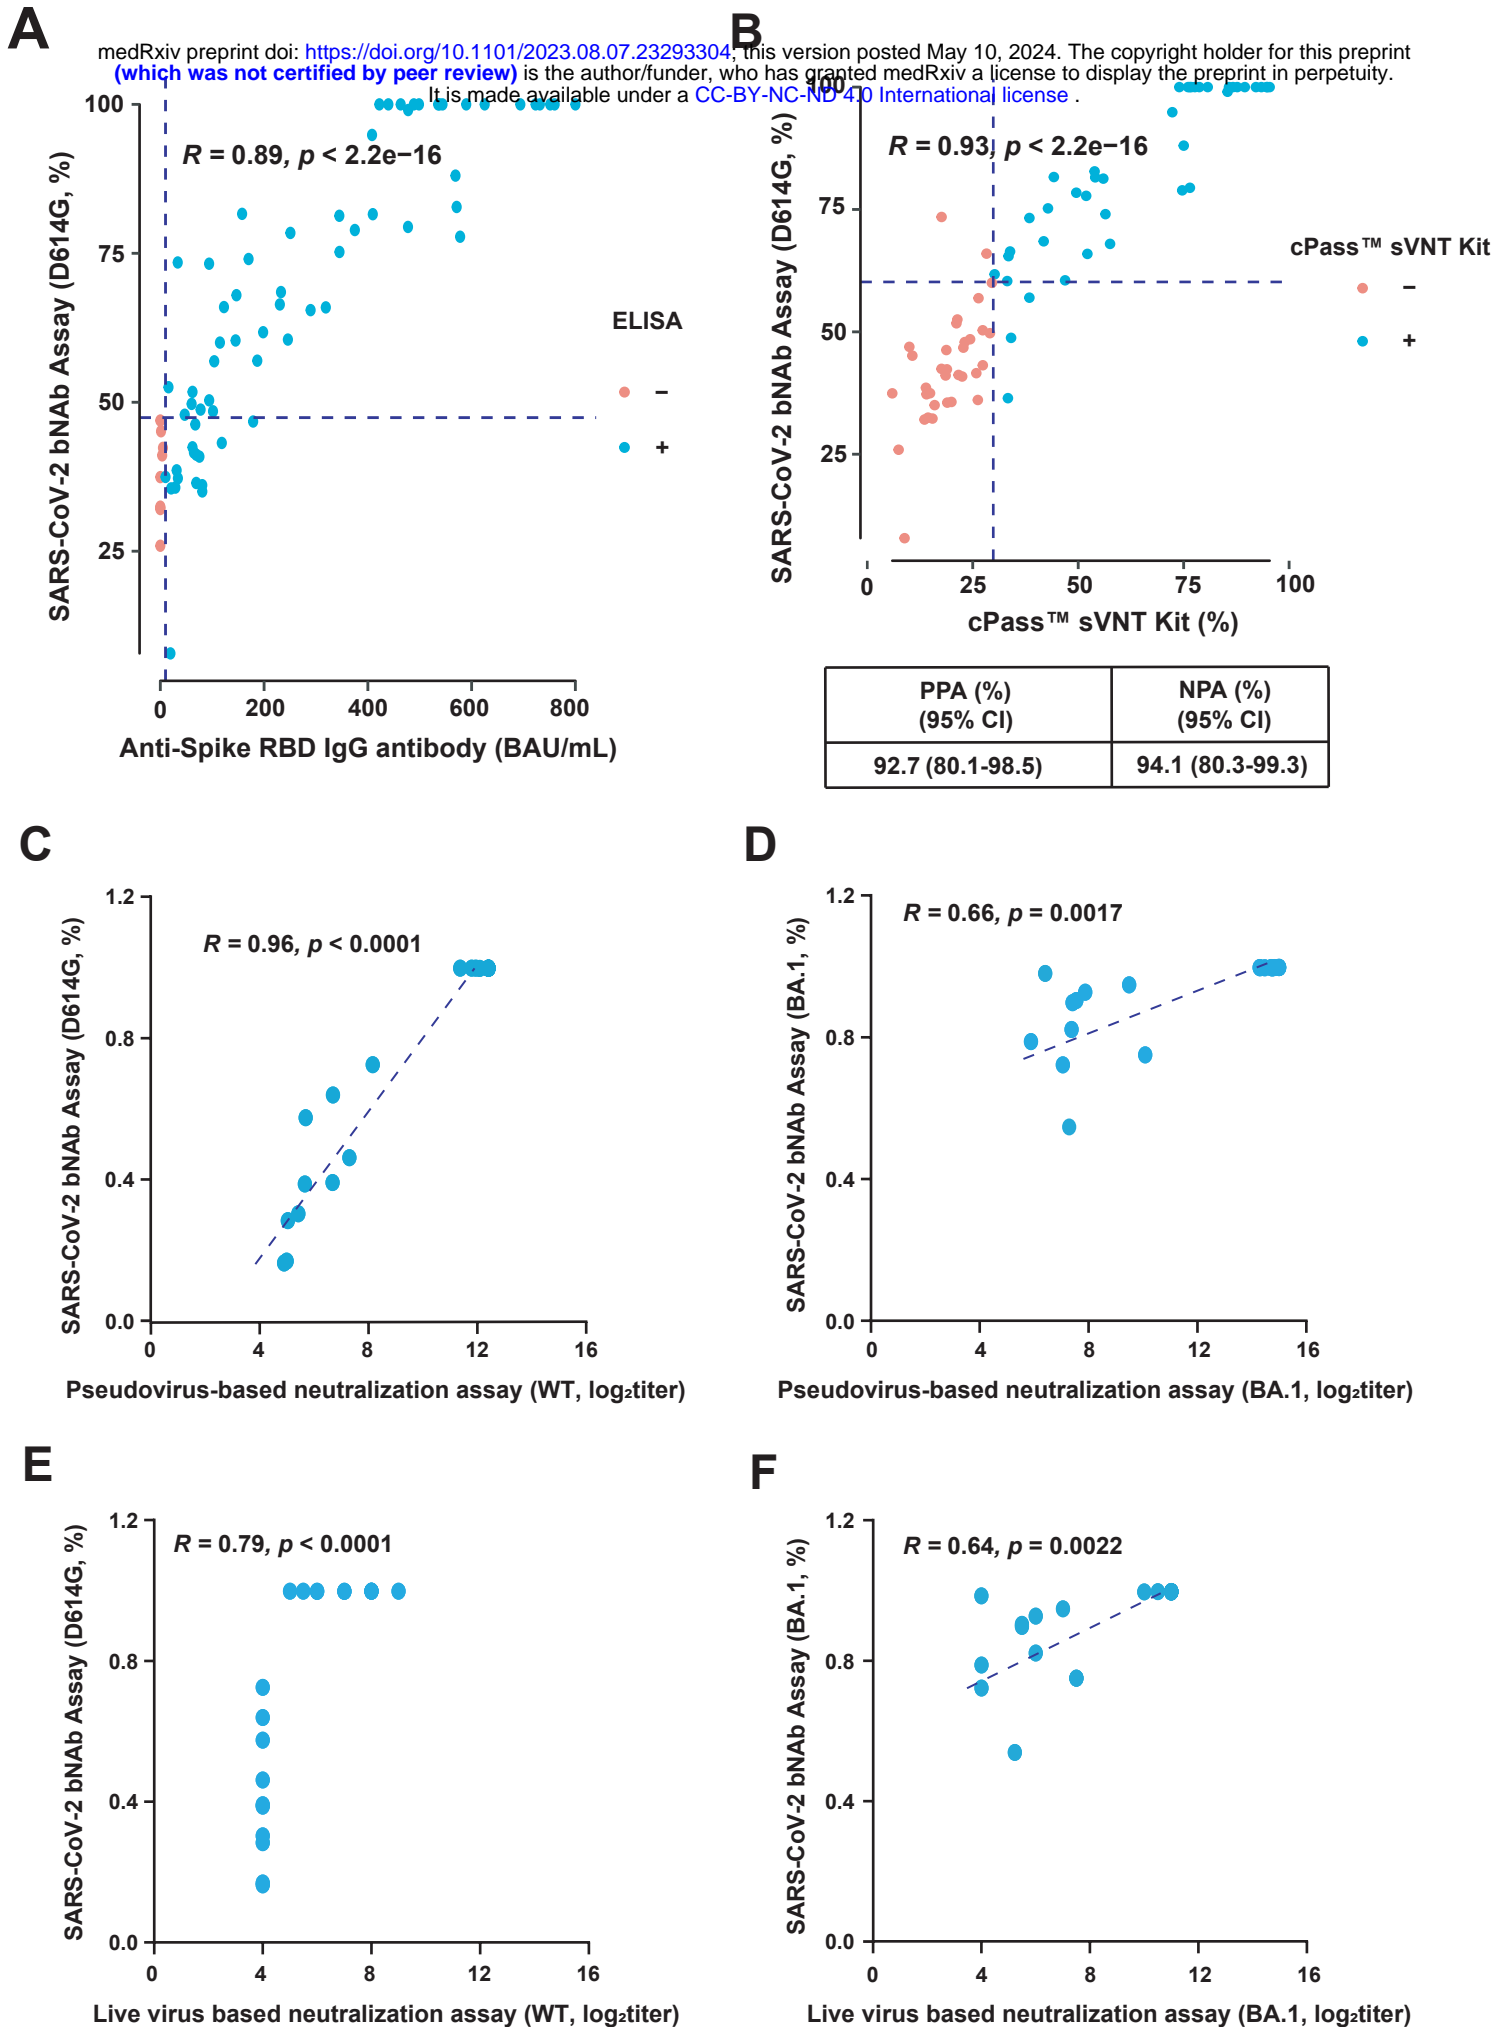

# Figure 4

**A**

medRxiv preprint doi: <https://doi.org/10.1101/2023.08.07.23298934>; this version posted May 10, 2024. The copyright holder for this preprint (which was not certified by peer review) is the author/funder, who has granted medRxiv a license to display the preprint in perpetuity. It is made available under a [CC-BY-NC-ND 4.0 International license](https://creativecommons.org/licenses/by-nc-nd/4.0/).

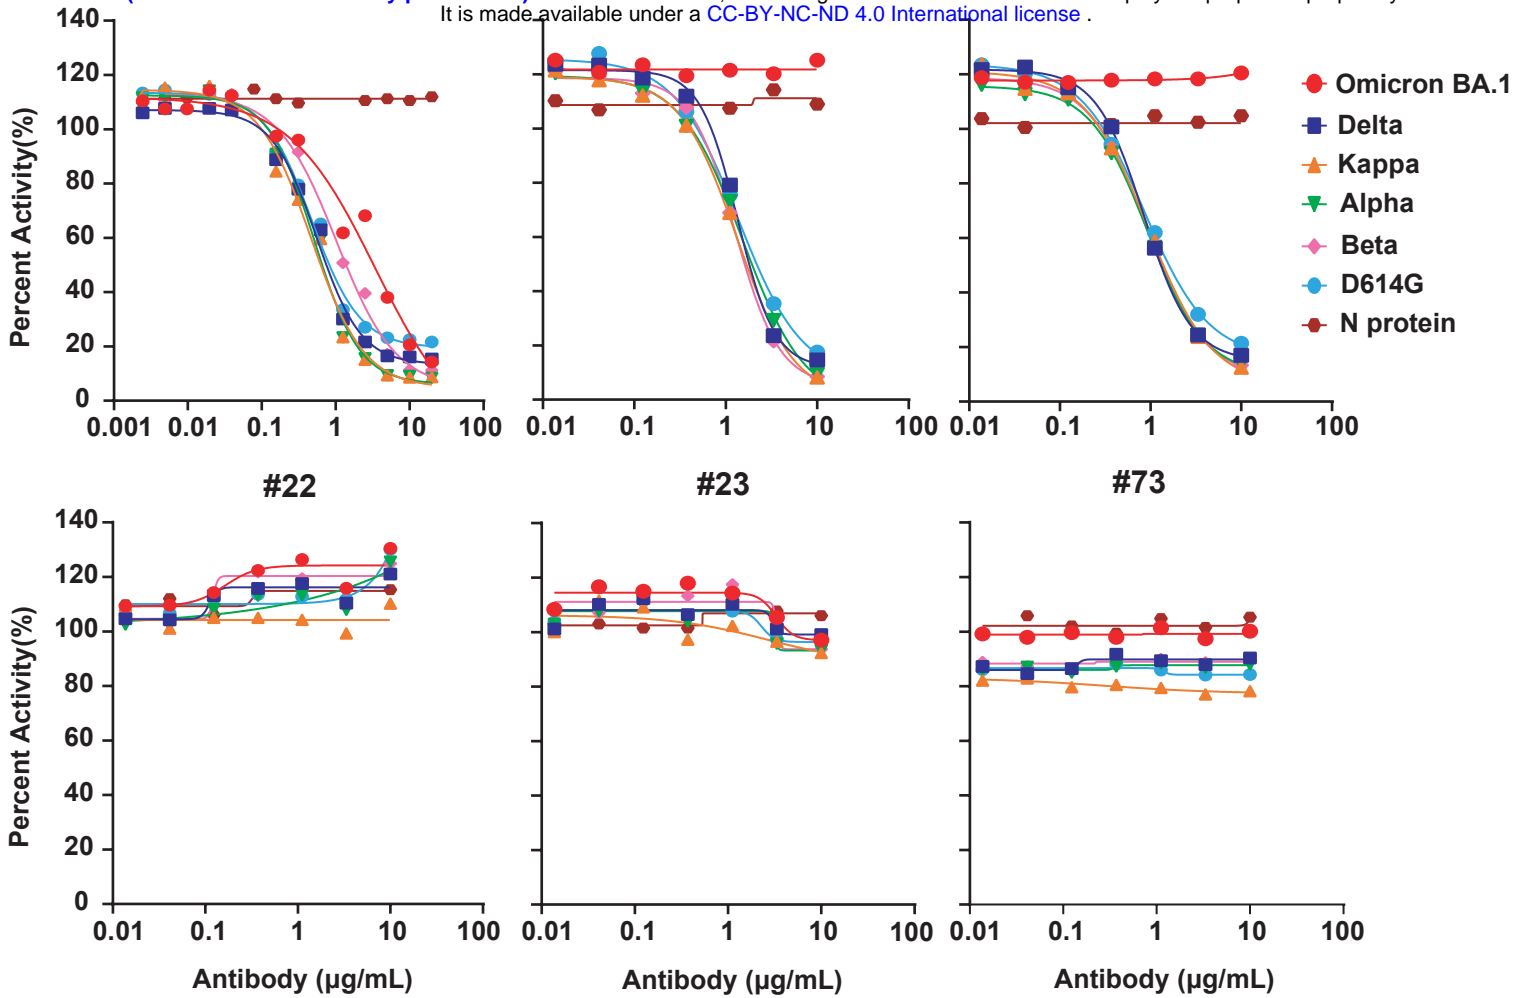

**B**

|     | D614G  | Alpha  | Beta   | Delta  | Kappa  | Omicron BA.1 |
|-----|--------|--------|--------|--------|--------|--------------|
| #26 | 0.4739 | 0.511  | 1.021  | 0.5504 | 0.468  | 3.429        |
| #20 | 1.365  | 1.524  | 1.266  | 1.343  | 1.324  | > 10         |
| #21 | 0.8505 | 0.9199 | 0.8998 | 0.8429 | 0.9445 | > 10         |
| #22 | > 10   | > 10   | > 10   | > 10   | > 10   | > 10         |
| #23 | > 10   | > 10   | > 10   | > 10   | > 10   | > 10         |
| #73 | > 10   | > 10   | > 10   | > 10   | > 10   | > 10         |

IC50 ( $\mu\text{g/mL}$ )

0      5      10



# Figure 5

**A**

medRxiv preprint doi: <https://doi.org/10.1101/2023.08.07.23293304>; this version posted May 10, 2024. The copyright holder for this preprint (which was not certified by peer review) is the author/funder, who has granted medRxiv a license to display the preprint in perpetuity. It is made available under a CC-BY-NC-ND 4.0 International license.

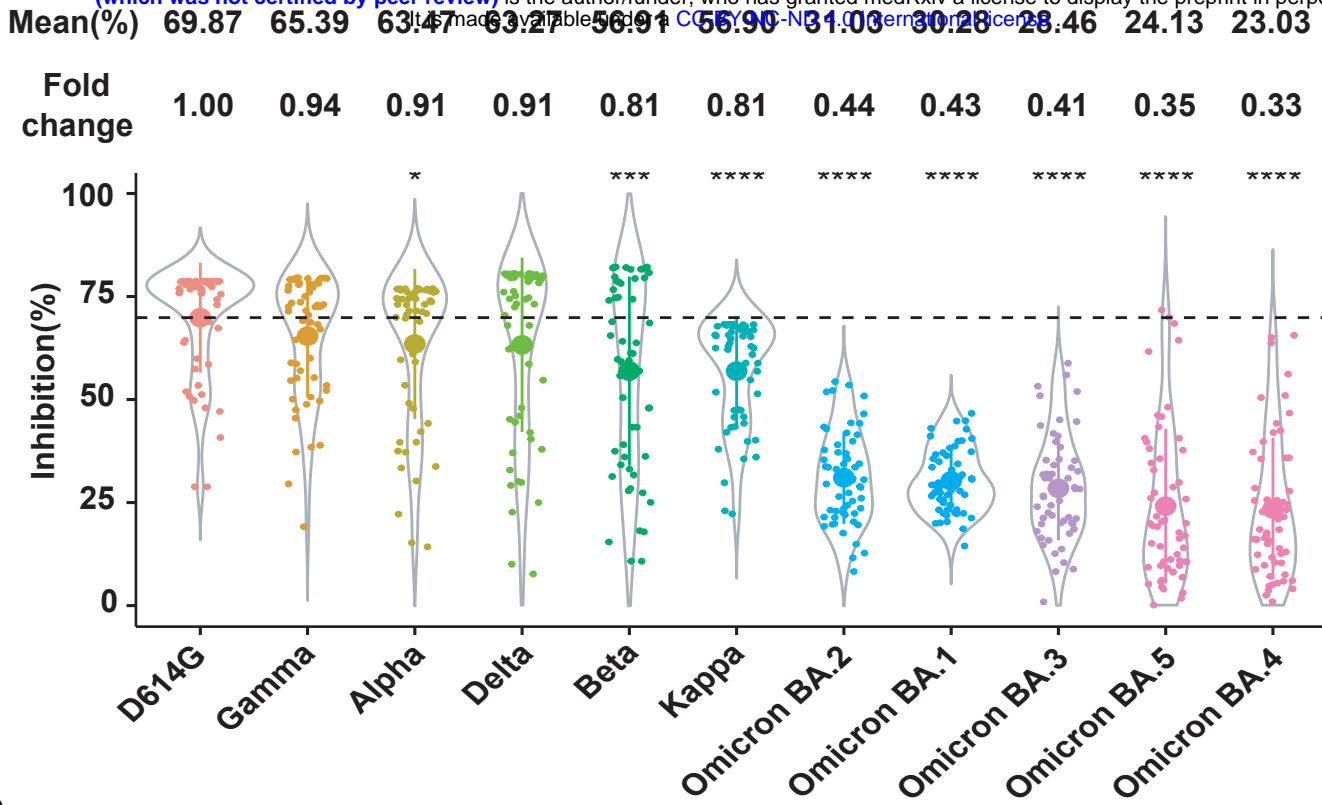

**B**

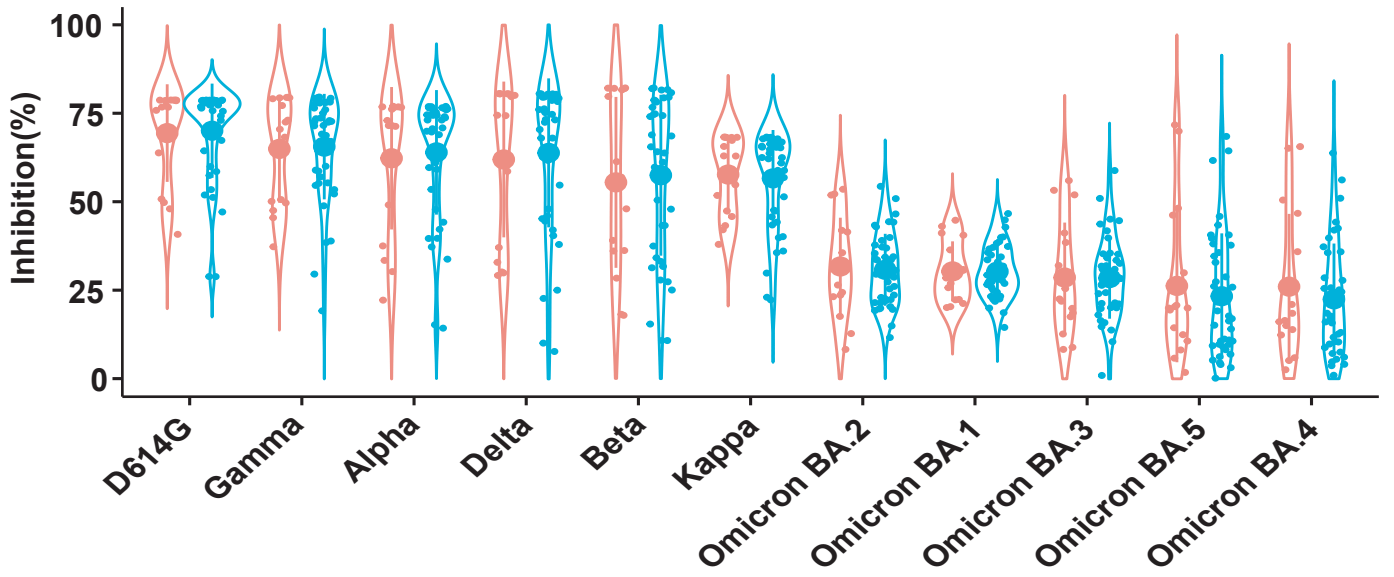

Vaccine type ◻ Inactivated ◻ Recombinant
